# Supplementary material for: Turn-on fluorescent probe towards glyphosate and Cr3+ based on Cd(ii)-metal organic framework with Lewis basic sites
Source: Royal Society of Chemistry journal article supplement (doi:10.1039/d0qi00947d), 2020-12-10
Supplement: d0qi00947d1.pdf [file d0qi00947d1.pdf]

## Supplementary material

# Turn-on fluorescent probe toward glyphosate and Cr<sup>3+</sup> based on Cd(II)-metal organic framework with Lewis basic sites

Theanchai Wiwasuku,<sup>a</sup> Jaurusup Boonmak,<sup>a\*</sup> Rodjana Burakam,<sup>a</sup>  
Sarinya Hadsadee,<sup>b</sup> Siriporn Jungsuttiwong,<sup>b</sup> Sareeya Bureekaew,<sup>c</sup> Vinich Promarak,<sup>d</sup>  
and Sujitra Youngme<sup>a</sup>

---

<sup>a</sup>Materials Chemistry Research Centre, Department of Chemistry and Centre of Excellence for Innovation in Chemistry, Faculty of Science, Khon Kaen University, Khon Kaen, 40002, Thailand.

<sup>b</sup>Center for Organic Electronic and Alternative Energy, Department of Chemistry and Center of Excellence for Innovation in Chemistry, Faculty of Science, Ubon Ratchathani University, Ubon Ratchathani 34190, Thailand

<sup>c</sup>School of Energy Science and Engineering, Vidyasirimedhi Institute of Science and Technology (VISTEC), Rayong, 21210, Thailand.

<sup>d</sup>School of Molecular Science and Engineering, Vidyasirimedhi Institute of Science and Technology (VISTEC), Rayong, 21210, Thailand.

\* E-mail: [jaurusup@kku.ac.th](mailto:jaurusup@kku.ac.th)

| Parameter                                                              | <b>1</b>                                                        | <b>1-NH<sub>2</sub></b>                                         |
|------------------------------------------------------------------------|-----------------------------------------------------------------|-----------------------------------------------------------------|
| Empirical formula                                                      | C <sub>18</sub> H <sub>12</sub> CdN <sub>4</sub> O <sub>4</sub> | C <sub>18</sub> H <sub>13</sub> CdN <sub>5</sub> O <sub>4</sub> |
| Formula weight                                                         | 460.72                                                          | 475.73                                                          |
| Crystal system                                                         | Orthorhombic                                                    | Orthorhombic                                                    |
| Space group                                                            | <i>Cmca</i>                                                     | <i>Cmca</i>                                                     |
| a (Å)                                                                  | 13.6401(5)                                                      | 13.7017(6)                                                      |
| b (Å)                                                                  | 20.7509(7)                                                      | 20.9274(8)                                                      |
| c (Å)                                                                  | 14.4681(5)                                                      | 14.7410(7)                                                      |
| α (°)                                                                  | 90                                                              | 90                                                              |
| β (°)                                                                  | 90                                                              | 90                                                              |
| γ (°)                                                                  | 90                                                              | 90                                                              |
| V (Å <sup>3</sup> )                                                    | 4095.1(2)                                                       | 4226.8(3)                                                       |
| Z                                                                      | 8                                                               | 8                                                               |
| D <sub>calc</sub> (gcm <sup>-3</sup> )                                 | 1.495                                                           | 1.495                                                           |
| Data/res/parameters                                                    | 2538/173/151                                                    | 2258/183/157                                                    |
| GOF on F <sup>2</sup>                                                  | 0.794                                                           | 0.902                                                           |
| R <sub>1</sub> <sup>a</sup> , wR <sub>2</sub> <sup>b</sup> [I > 2σ(I)] | 0.0375/0.1063                                                   | 0.0449/0.1419                                                   |
| R <sub>1</sub> <sup>a</sup> , wR <sub>2</sub> <sup>b</sup> (all data)  | 0.0448/0.1117                                                   | 0.0614/0.1518                                                   |

**Table S1** Crystallographic data and structural refinement for **1** and **1-NH<sub>2</sub>**

$${}^aR_1 = \sum \|F_0\| - \|F_c\| / \sum \|F_0\|, {}^b wR_2 = [ \sum w(F_o^2 - F_c^2)^2 / \sum w(F_o^2)^2 ]^{1/2}$$

**Table S2** Selected bond distances (Å) and angle (°) for compound **1**

|                                      | <b>Distances (Å)</b> |
|--------------------------------------|----------------------|
| Cd1—O2                               | 2.300(3)             |
| Cd1—N1                               | 2.320(3)             |
| Cd1—N1 <sup>1</sup>                  | 2.320(3)             |
| Cd1—O1 <sup>2</sup>                  | 2.346(4)             |
| Cd1—O4 <sup>3</sup>                  | 2.365(3)             |
| Cd1—O3 <sup>3</sup>                  | 2.393(3)             |
| Cd1—O3 <sup>3</sup>                  | 2.607(3)             |
|                                      | <b>Angles (°)</b>    |
| O2—Cd1—N1                            | 92.97(9)             |
| O2—Cd1—N1 <sup>1</sup>               | 92.97(9)             |
| N1—Cd1—N1 <sup>1</sup>               | 170.43(17)           |
| O2—Cd1—O1 <sup>2</sup>               | 130.10(11)           |
| N1—Cd1—O1 <sup>2</sup>               | 85.22(8)             |
| N1 <sup>1</sup> —Cd1—O1 <sup>2</sup> | 85.21(8)             |
| O2—Cd1—O4 <sup>3</sup>               | 84.71(12)            |
| N1—Cd1—O4 <sup>3</sup>               | 94.01(8)             |
| N1 <sup>1</sup> —Cd1—O4 <sup>3</sup> | 94.01(8)             |
| O1 <sup>2</sup> —Cd1—O4 <sup>3</sup> | 145.18(11)           |
| O2—Cd1—O3 <sup>3</sup>               | 139.75(11)           |
| N1—Cd1—O3 <sup>3</sup>               | 90.16(8)             |
| N1 <sup>1</sup> —Cd1—O3 <sup>3</sup> | 90.15(8)             |
| O1 <sup>2</sup> —Cd1—O3 <sup>3</sup> | 90.15(10)            |
| O4 <sup>3</sup> —Cd1—O3 <sup>3</sup> | 55.03(11)            |
| O2—Cd1—O1                            | 52.76(11)            |
| N1—Cd1—O1                            | 88.81(8)             |
| N1 <sup>1</sup> —Cd1—O1              | 88.81(8)             |
| O1 <sup>2</sup> —Cd1—O1              | 77.34(12)            |
| O4 <sup>3</sup> —Cd1—O1              | 137.47(11)           |
| O3 <sup>3</sup> —Cd1—O1              | 167.49(11)           |

Symmetry codes: (1)  $I-x, +y, +z$ ; (2)  $I-x, I-y, I-z$ ; (3)  $+x, -I/2+y, I/2-z$ ; (4)  $+x, I/2+y, I/2-z$

**Table S3** Selected bond distances (Å) and angle (°) for compound **1-NH<sub>2</sub>**

|                                      | <b>Distances (Å)</b> |
|--------------------------------------|----------------------|
| Cd1—O1                               | 2.242(5)             |
| Cd1—O2 <sup>1</sup>                  | 2.326(6)             |
| Cd1—O4 <sup>2</sup>                  | 2.327(5)             |
| Cd1—N1 <sup>3</sup>                  | 2.340(5)             |
| Cd1—N1                               | 2.340(5)             |
| Cd1—O3 <sup>2</sup>                  | 2.423(5)             |
|                                      | <b>Angles (°)</b>    |
| O1—Cd1—O2 <sup>1</sup>               | 128.61(18)           |
| O1—Cd1—O4 <sup>2</sup>               | 142.39(18)           |
| O2 <sup>1</sup> —Cd1—O4 <sup>2</sup> | 89.00(16)            |
| O1—Cd1—N1 <sup>3</sup>               | 91.69(11)            |
| O2 <sup>1</sup> —Cd1—N1 <sup>3</sup> | 85.73(11)            |
| O4 <sup>2</sup> —Cd1—N1 <sup>3</sup> | 91.17(10)            |
| O1—Cd1—N1                            | 91.69(11)            |
| O2 <sup>1</sup> —Cd1—N1              | 85.73(11)            |
| O4 <sup>2</sup> —Cd1—N1              | 91.17(10)            |
| N1 <sup>3</sup> —Cd1—N1              | 171.1(2)             |
| O1—Cd1—O3 <sup>2</sup>               | 88.19(18)            |
| O2 <sup>1</sup> —Cd1—O3 <sup>2</sup> | 143.20(17)           |
| O4 <sup>2</sup> —Cd1—O3 <sup>2</sup> | 54.20(17)            |
| N1 <sup>3</sup> —Cd1—O3 <sup>2</sup> | 94.16(11)            |
| N1—Cd1—O3 <sup>2</sup>               | 94.16(11)            |

Symmetry codes: (1)  $I-x, -y, I-z$ ; (2)  $+x, -I/2+y, I/2-z$ ; (3)  $I-x, +y, +z$ ; (4)  $+x, I/2+y, I/2-z$

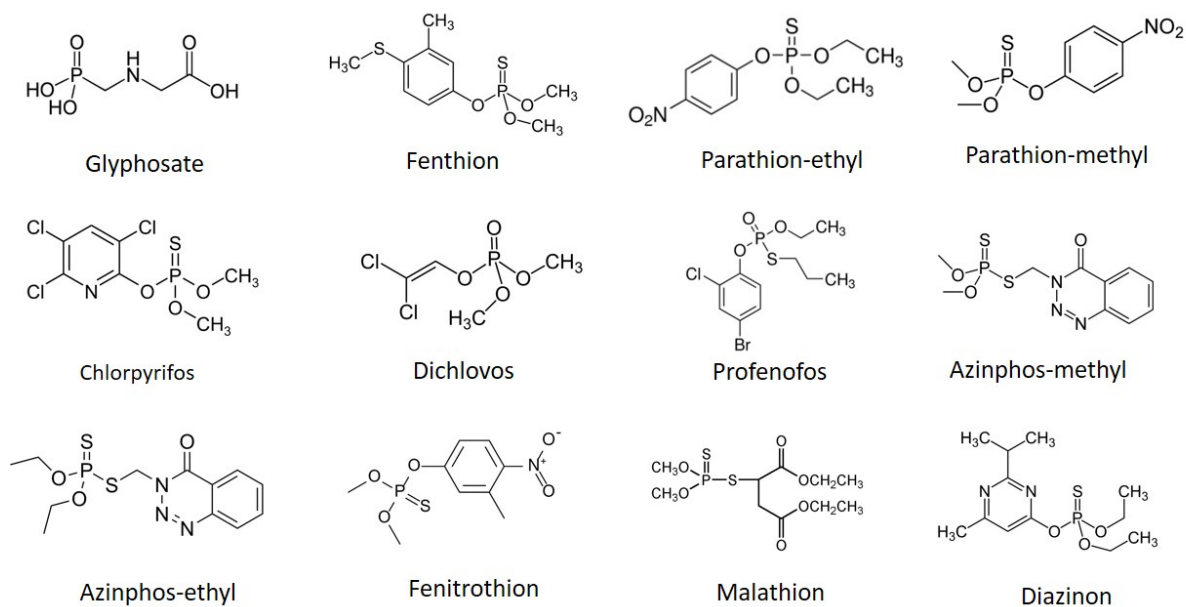

**Fig. S1** Chemical structures of the selected pesticides.

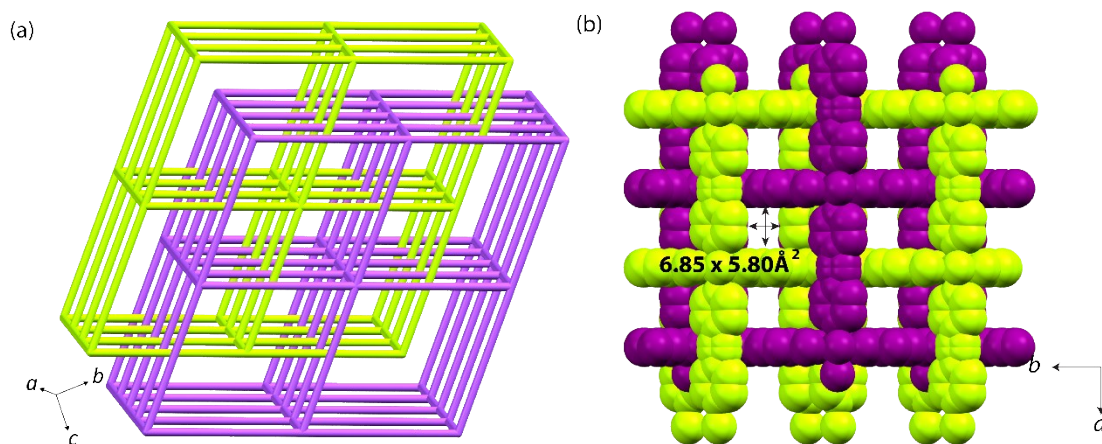

**Fig. S2** (a) Topological feature of  $1\text{-NH}_2$  along  $a$  axis. (b) 2-fold interpenetrated 3D framework of  $1\text{-NH}_2$  in space filling mode.

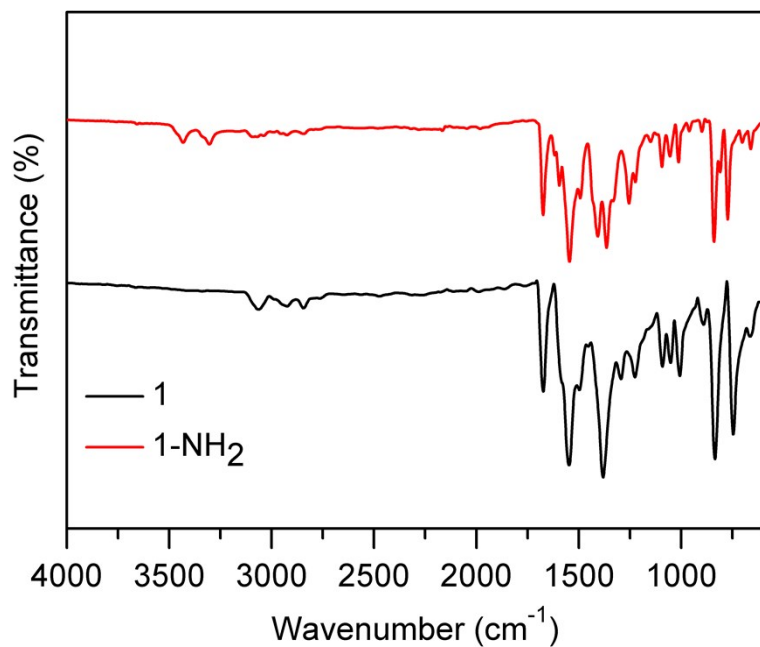

**Fig. S3** FT-IR spectra of **1** and **1-NH<sub>2</sub>**.

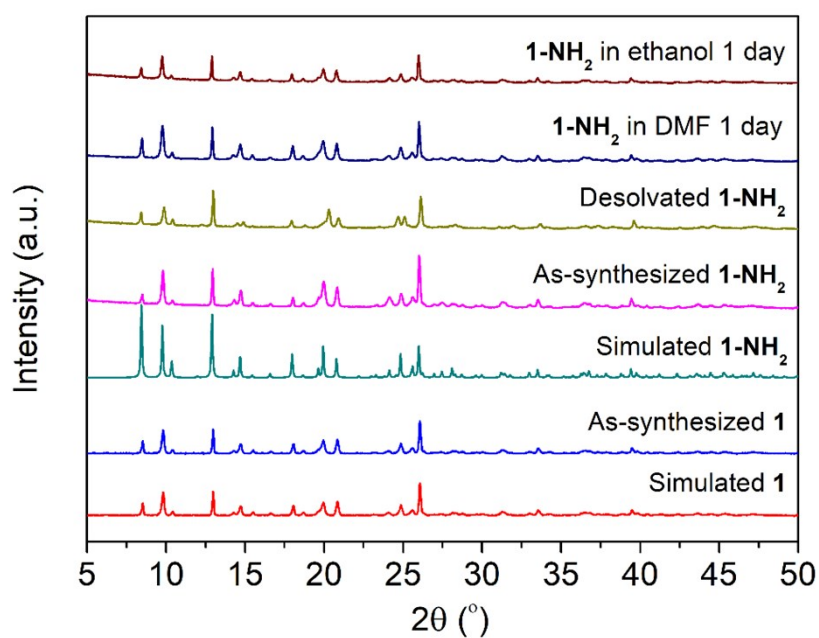

**Fig. S4** PXRD patterns for the simulated and as-synthesized **1** and **1-NH<sub>2</sub>**.

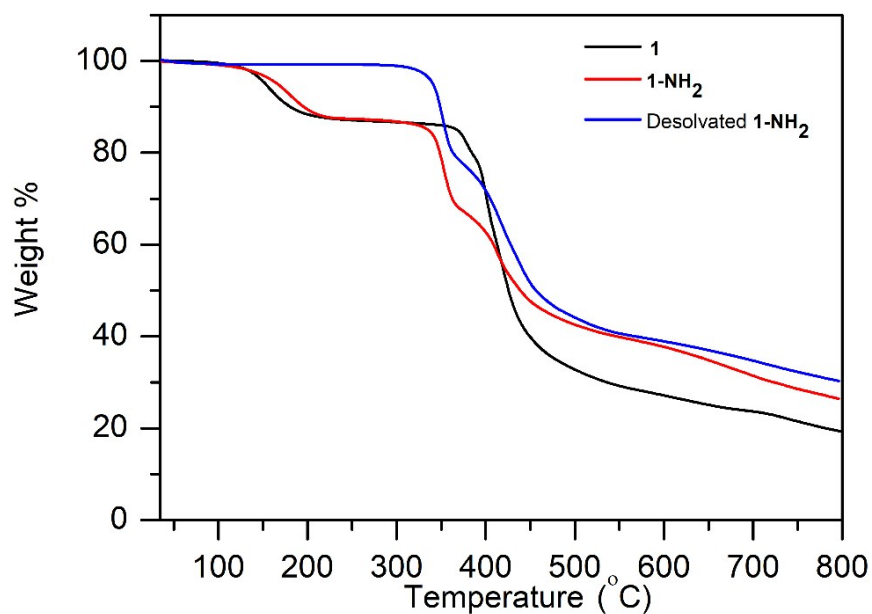

**Fig. S5** TGA curves for as-synthesized **1** and **1-NH<sub>2</sub>** and desolvated **1-NH<sub>2</sub>**.

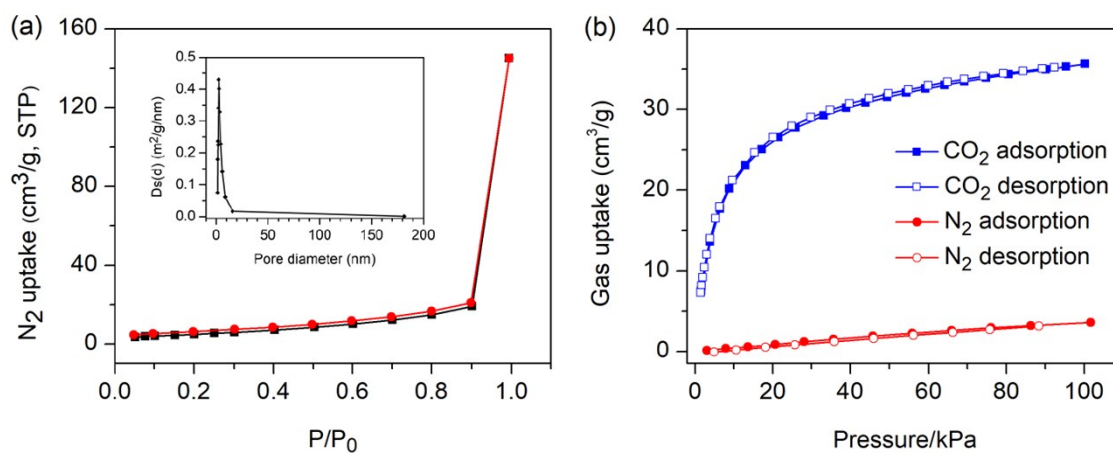

**Fig. S6** (a) N<sub>2</sub> adsorption isotherm of desolvated **1-NH<sub>2</sub>** at 77 K (inset: pore size distribution of desolvated **1-NH<sub>2</sub>**) (b) Gas adsorption isotherms of desolvated **1-NH<sub>2</sub>** at 295 K.

**Table S4** Calculation of standard deviation of fluorescence intensity for glyphosate sensing

| <b>Blank reading<br/>(only 1-NH<sub>2</sub>)</b> | <b>Fluorescent intensity<br/>at 434 nm</b> |
|--------------------------------------------------|--------------------------------------------|
| Reading 1                                        | 4437.849                                   |
| Reading 2                                        | 4614.951                                   |
| Reading 3                                        | 4526.954                                   |
| Reading 4                                        | 4558.367                                   |
| Reading 5                                        | 4460.107                                   |
| Reading 6                                        | 4387.441                                   |
| Reading 7                                        | 4377.512                                   |
| Reading 8                                        | 4462.322                                   |
| Reading 9                                        | 4533.827                                   |
| Reading 10                                       | 4670.202                                   |
| <b>Standard deviation (<math>\delta</math>)</b>  | 95.4051                                    |
| <b>Slope from calibration graph (m)</b>          | 11375.0506                                 |
| <b>LOD (<math>3\delta/m</math>)</b>              | 0.025 $\mu$ M                              |



**Table S5** Fluorescent sensor for glyphosate detection based on MOF and other fluorescent materials

| Fluorescent material                                        | Fluorescent response | Mechanism                                | LOD     | Ref.             |
|-------------------------------------------------------------|----------------------|------------------------------------------|---------|------------------|
| <b>MOFs</b>                                                 |                      |                                          |         |                  |
| Fe <sub>3</sub> O <sub>4</sub> @SiO <sub>2</sub> @UiO-67    | Enhancement          | Electron transfer                        | 1 μM    | [1]              |
| [Cd(NH <sub>2</sub> -bdc)(azp)]·DMF                         | Enhancement          | Structural dissociation inhibited PET    | 25 nM   | <b>This work</b> |
| <b>Other fluorescent materials</b>                          |                      |                                          |         |                  |
| IgG-Carbon dot                                              | Enhancement          | Immune Reaction                          | 47 nM   | [2]              |
| Carbon dot                                                  | Enhancement          | Competitive affinity                     | 95 nM   | [3]              |
| Carbon dot                                                  | Quenching            | Fluorescent-resonance energy transfer    | 0.6 μM  | [4]              |
| Graphene quantum dots-silver nanoparticles                  | Quenching            | Reduction of metal-enhanced fluorescence | 53 nM   | [5]              |
| Calixarene-grafted Ruthenium(II)bipyridine Doped Silica NPs | Enhancement          | Switch on FRET                           | 0.79 μM | [6]              |

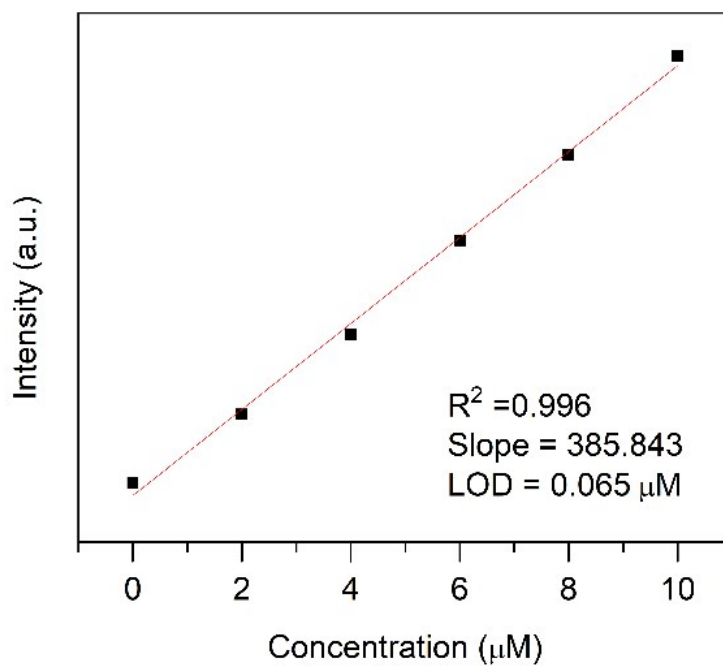

**Fig. S7** The linear enhancement response of bulk phase **1-NH<sub>2</sub>** toward glyphosate.

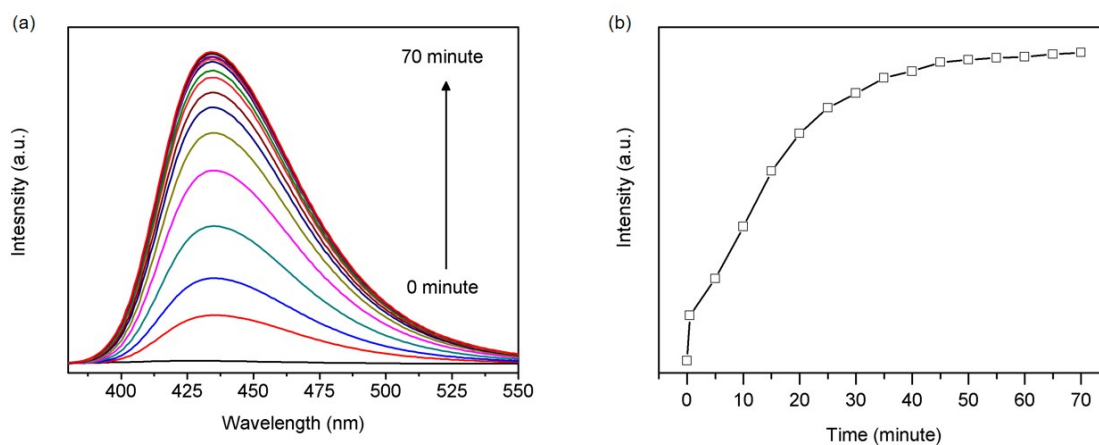

**Fig. S8** (a) Fluorescence response of **1-NH<sub>2</sub>** toward glyphosate at different times.

b) Plot of time dependent fluorescence intensity at 434 nm.

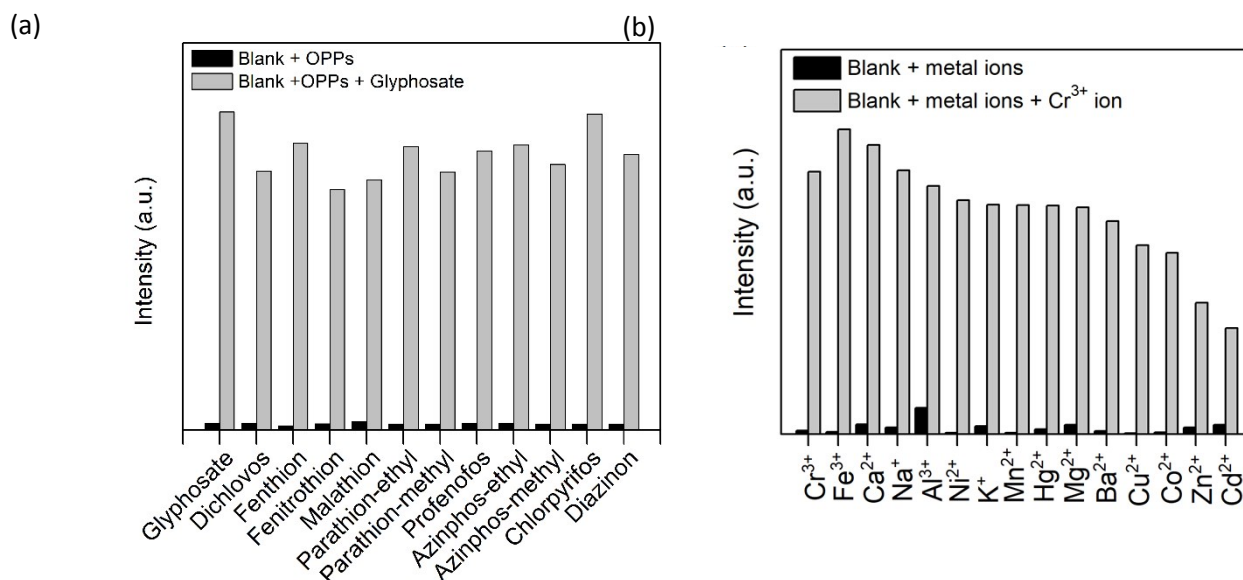

**Fig. S9** (a) Fluorescent intensity response of **1-NH<sub>2</sub>** at 434 nm in the presence of the selected OPPs (black bar) and **1-NH<sub>2</sub>** + glyphosate upon the addition of interferent OPPs (gray bar) (total concentration of OPPs is 50  $\mu$ M). (b) Fluorescent intensity response of **1-NH<sub>2</sub>** at 434 nm in the presence of the selected metal ions (black bar) and **1-NH<sub>2</sub>** + Cr<sup>3+</sup> upon the addition of interferent cations (gray bar) (total concentration of metal ions is 50  $\mu$ M).

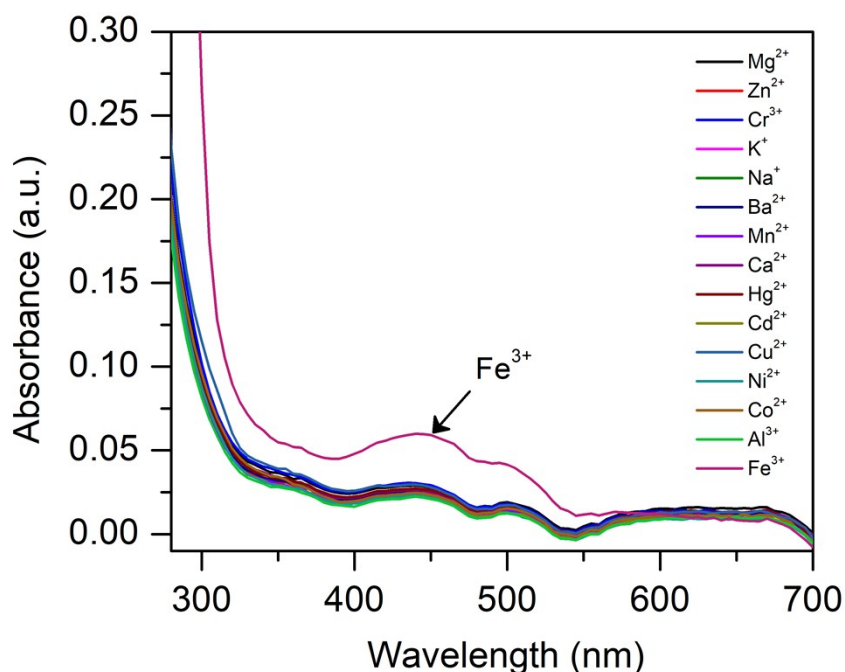

**Fig. S10** UV-Vis absorption spectra of different metal ions in DMF.

**Table S6** Calculation of standard deviation of fluorescence intensity for  $\text{Cr}^{3+}$  sensing

| <b>Blank reading<br/>(only 1-NH<sub>2</sub>)</b> | <b>Fluorescent intensity<br/>at 434 nm</b> |
|--------------------------------------------------|--------------------------------------------|
| Reading 1                                        | 751.551                                    |
| Reading 2                                        | 745.172                                    |
| Reading 3                                        | 726.349                                    |
| Reading 4                                        | 753.238                                    |
| Reading 5                                        | 707.114                                    |
| Reading 6                                        | 722.223                                    |
| Reading 7                                        | 726.112                                    |
| Reading 8                                        | 717.274                                    |
| Reading 9                                        | 728.123                                    |
| Reading 10                                       | 770.443                                    |
| <b>Standard deviation (<math>\delta</math>)</b>  | 19.4889                                    |
| <b>Slope from calibration graph (m)</b>          | 98.7274                                    |
| <b>LOD (<math>3\delta/m</math>)</b>              | 0.60 $\mu\text{M}$                         |

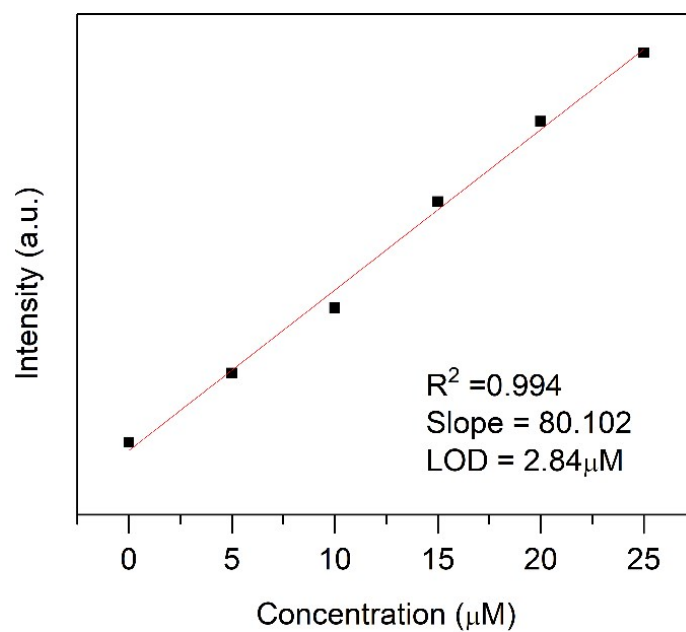

**Fig. S11** The linear enhancement response of bulk phase  $1\text{-NH}_2$  toward  $\text{Cr}^{3+}$ .

**Table S7** Fluorescent sensor for Cr<sup>3+</sup> detection based on various MOFs and other fluorescent materials

| Fluorescent material                                                                               | Fluorescent response | Mechanism                                                       | LOD      | Ref.             |
|----------------------------------------------------------------------------------------------------|----------------------|-----------------------------------------------------------------|----------|------------------|
| <b>MOFs</b>                                                                                        |                      |                                                                 |          |                  |
| [Zn(L)(H <sub>2</sub> O)]·H <sub>2</sub> O                                                         | Quenching            | Inner filter affect                                             | 2.44 μM  | [7]              |
| [Eu <sub>2</sub> (tpbpc) <sub>4</sub> ·CO <sub>3</sub> ·H <sub>2</sub> O]·DMF                      | Quenching            | Inner filter affect & antenna effect inhibition                 | 70 μM    | [8]              |
| [Zn <sub>2</sub> (tpeb) <sub>2</sub> (2,3-ndc) <sub>2</sub> ]·H <sub>2</sub> O                     | Quenching            | Weak coordination                                               | 16 nM    | [9]              |
| Tb@[Cd <sub>4</sub> (NDIC) <sub>4</sub> (DMF) <sub>5</sub> (H <sub>2</sub> O)]·DMF                 | Quenching            | Collapse of the structure                                       | 0.075 μM | [10]             |
| [Zn <sub>3</sub> (bpdc) <sub>2</sub> (pdc) (DMF)]·6DMF                                             | Quenching            | Coordination inhibited energy transfer                          | 25.1 μM  | [11]             |
| [Zn <sub>2</sub> (TPOM)(NH <sub>2</sub> -bdc) <sub>2</sub> ]·4H <sub>2</sub> O                     | Enhancement          | Chelation enhanced fluorescence                                 | 4.9 μM   | [12]             |
| [Co <sub>3</sub> (BIBT) <sub>3</sub> (BTC) <sub>2</sub> (H <sub>2</sub> O) <sub>2</sub> ]·solvents | Enhancement          | Absorbance caused enhancement (ACE)                             | 0.1 μM   | [13]             |
| [Cd(NH <sub>2</sub> -bdc)(azp)]·DMF                                                                | Enhancement          | Structural dissociation inhibited PET                           | 0.6 μM   | <b>This work</b> |
| <b>Other fluorescent materials</b>                                                                 |                      |                                                                 |          |                  |
| TGA-CdSe QDs                                                                                       | Quenching            | Coordination modified valence band and conduction band energies | 11.3 nM  | [14]             |
| RDC-1                                                                                              | Enhancement          | Internal charge transfer                                        | 17.8 nM  | [15]             |
| Coumarin–Pyrazolone                                                                                | Quenching            | Nonfluorescent complex formation                                | 37 pM    | [16]             |
| Gold nanoparticle                                                                                  | Enhancement          | Aggregation induced emission                                    | 0.02 μM  | [17]             |
| PIN/CDS nanocomposite                                                                              | Enhancement          | Chelation enhanced fluorescence                                 | 0.47 μM  | [18]             |

L = 5-(2-methylpyridin-4-yl)isophthalate; tpbpc = 4'-[4,2';6',4'']-terpyridin-4'-yl-biphenyl-4-carboxylate; tpeb = 1,3,5-tri-4-pyridyl-1,2-ethenylbenzene; 2,3-ndc = 2,3-naphthalenedicarboxylic acid; NDIC = 5-(5-norbornene-2,3-dicarboximide)isophthalic acid; bpdc = 4,4'-biphenyldicarboxylic acid; pdc = pyridine-3,5-dicarboxylate, TPOM = tetrakis(4-pyridyloxymethylene)methane)

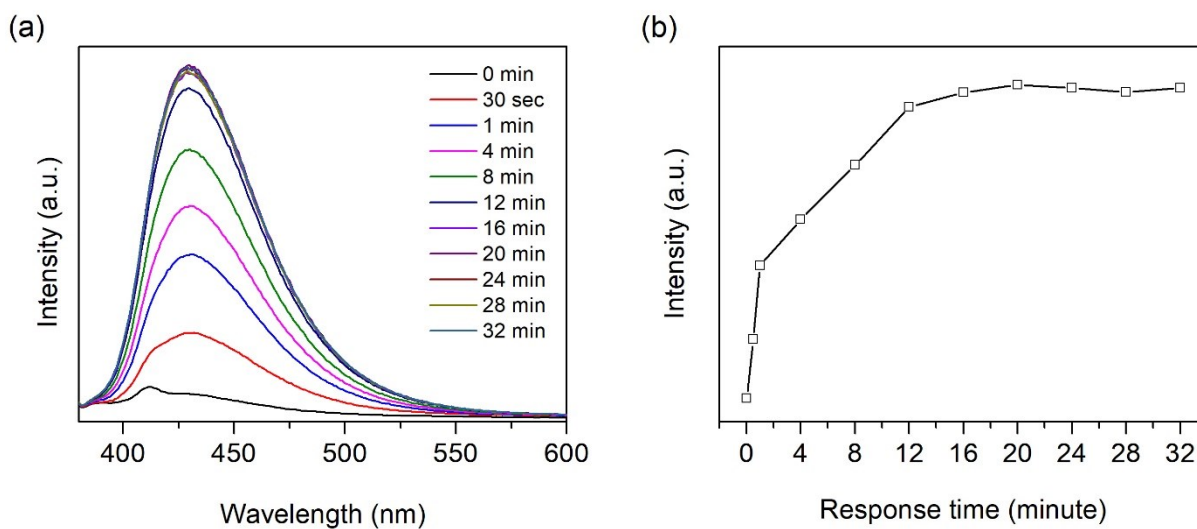

**Fig. S12** (a) Fluorescence response of **1-NH<sub>2</sub>** toward Cr<sup>3+</sup> ion (20  $\mu$ M) at 0-32 min.  
 (b) Plot of time dependent fluorescence intensity at 434 nm.

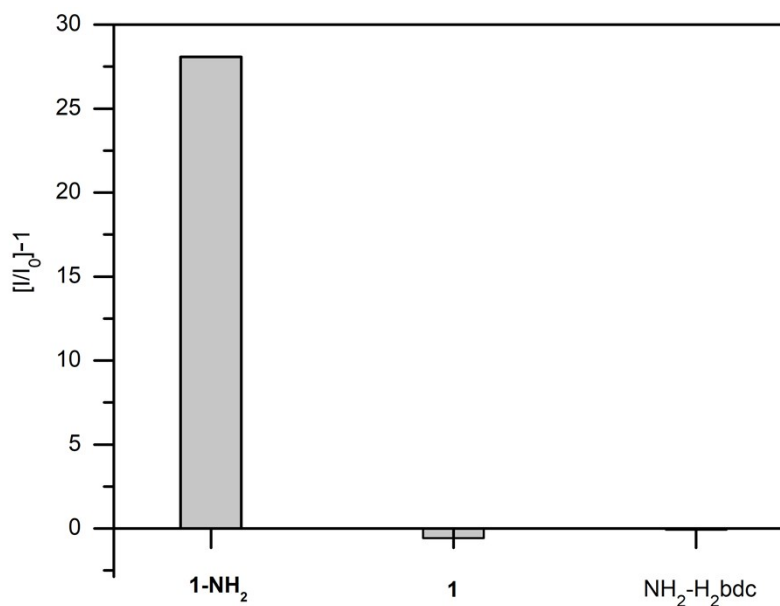

**Fig. S13** The fluorescent response of **1-NH<sub>2</sub>**, **1** and free NH<sub>2</sub>-H<sub>2</sub>bdc with the addition of 50  $\mu$ M Cr<sup>3+</sup> ion.

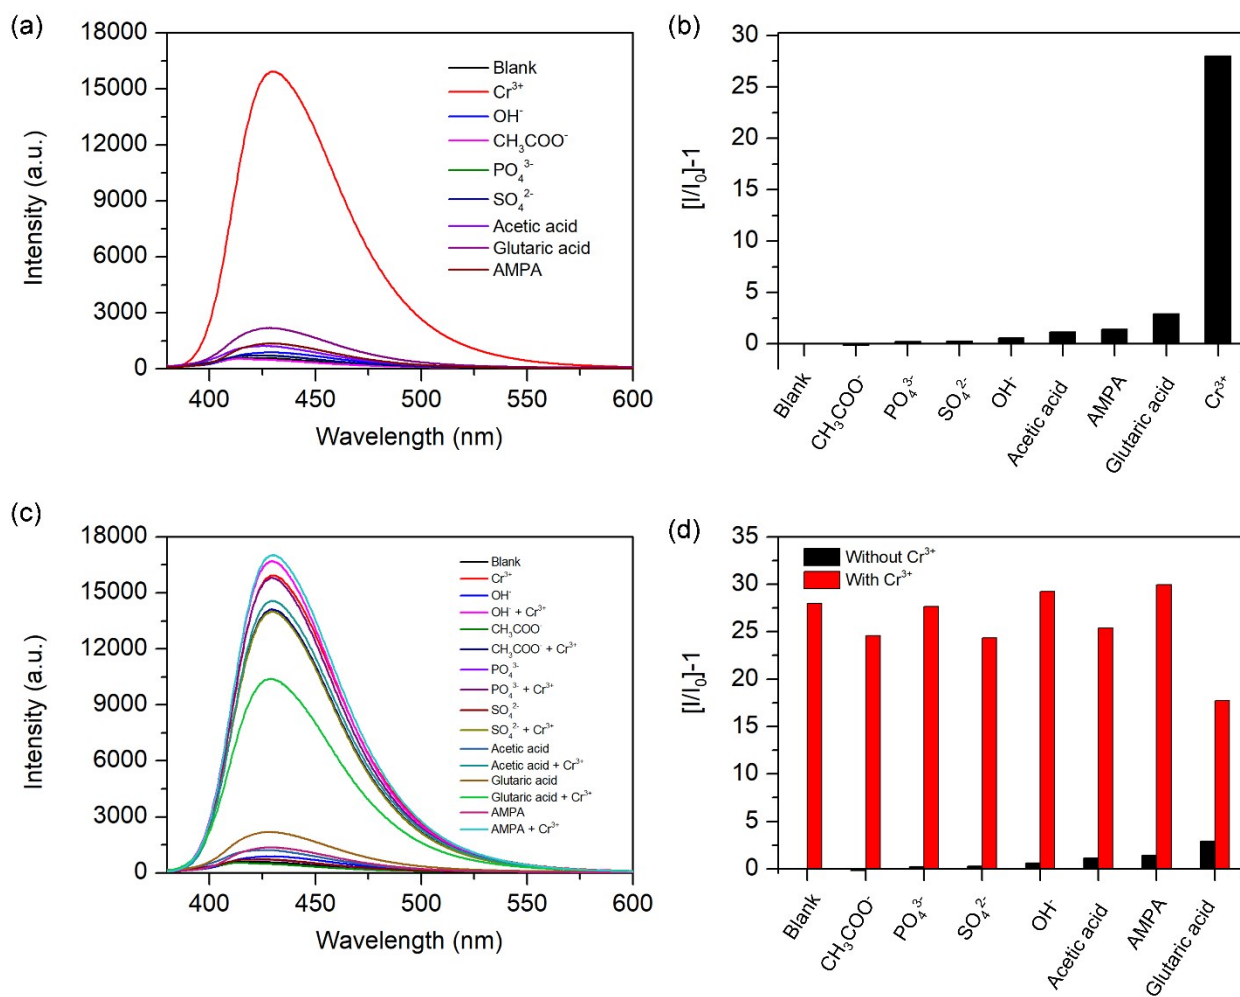

**Fig. S14.** (a) Fluorescent spectra and (b) fluorescent intensities of 1-NH<sub>2</sub> in the presence of 50 μM of different interfering species with respect to the emission at 434 nm in DMF media. (c) Fluorescent spectra and (d) fluorescent intensities of 1-NH<sub>2</sub> the presence of the interfering species without Cr<sup>3+</sup> (black bar) and with Cr<sup>3+</sup> (red bar).

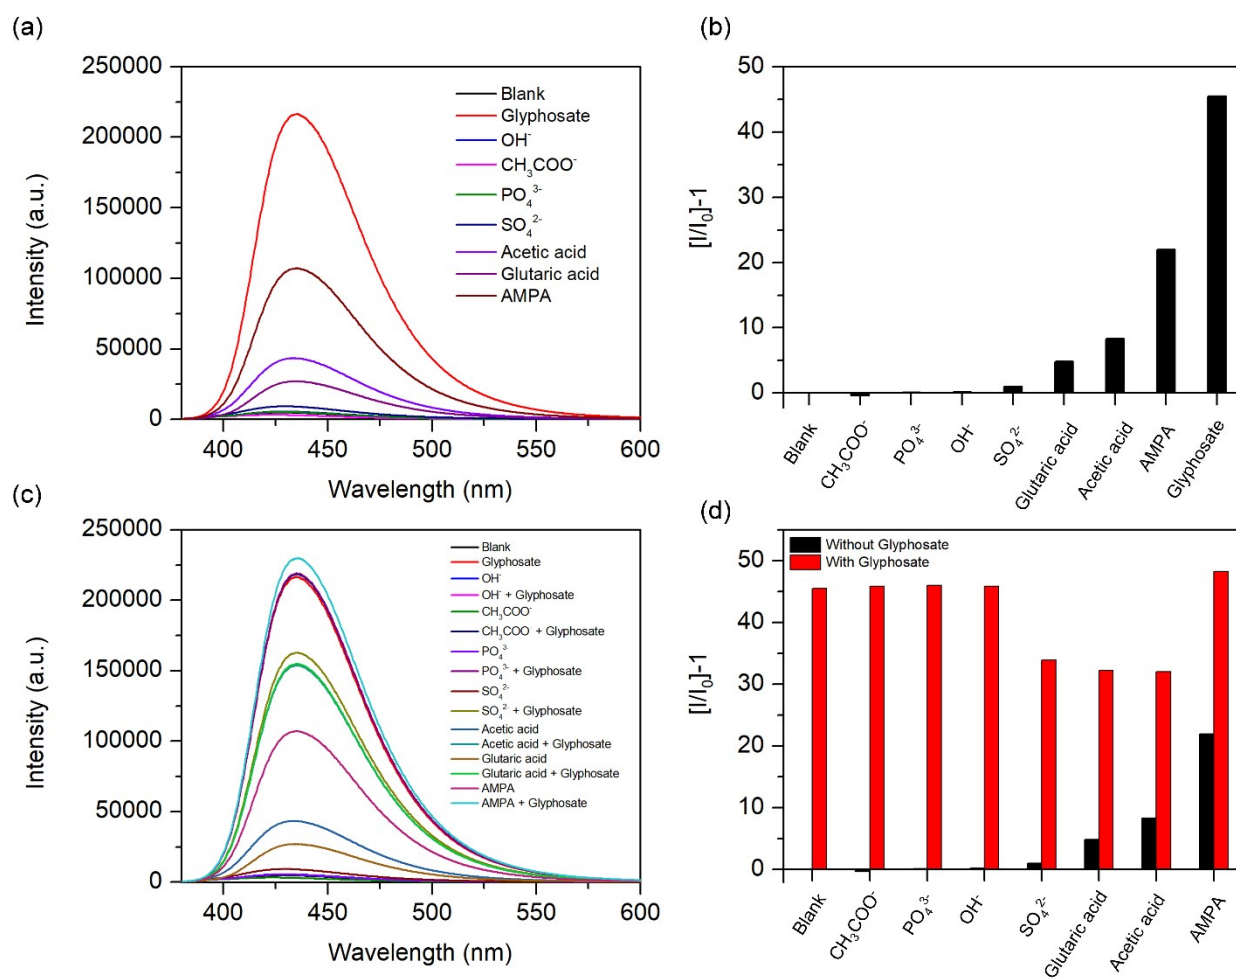

**Fig. S15.** (a) Fluorescent spectra and (b) fluorescent intensities of **1-NH<sub>2</sub>** in the presence of 50 μM of different interfering species with respect to the emission at 434 nm in ethanol media. (c) Fluorescent spectra and (d) fluorescent intensities of **1-NH<sub>2</sub>** the presence of the interfering species without glyphosate (black bar) and with glyphosate (red bar).



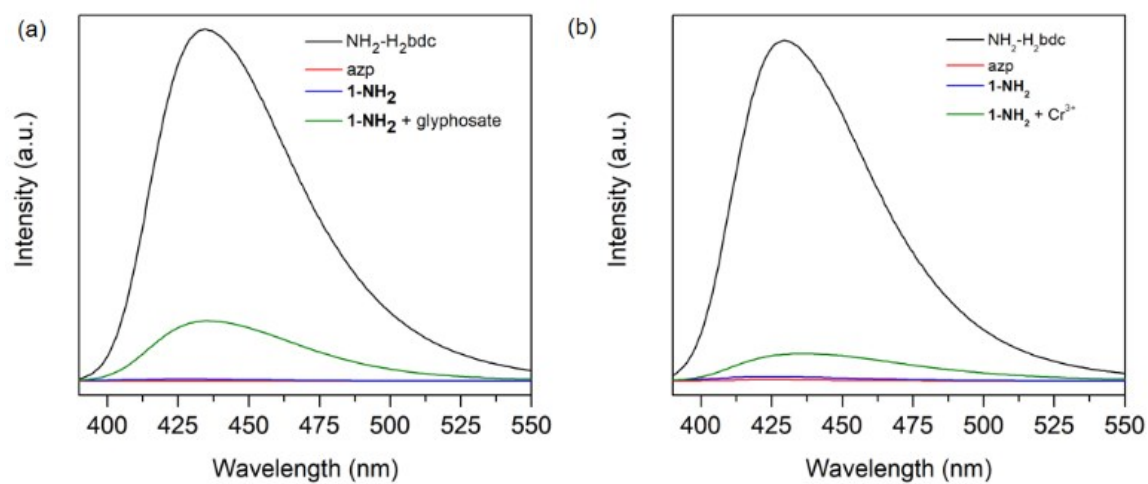

**Fig. S16** Fluorescent emission of  $\text{NH}_2\text{-H}_2\text{bdc}$ ,  $\text{azp}$  ligand,  $1\text{-NH}_2$ , and  $1\text{-NH}_2 + \text{glyphosate}$  in ethanol media (a) and  $\text{NH}_2\text{-H}_2\text{bdc}$ ,  $\text{azp}$  ligand,  $1\text{-NH}_2$ , and  $1\text{-NH}_2 + \text{Cr}^{3+}$  in DMF.

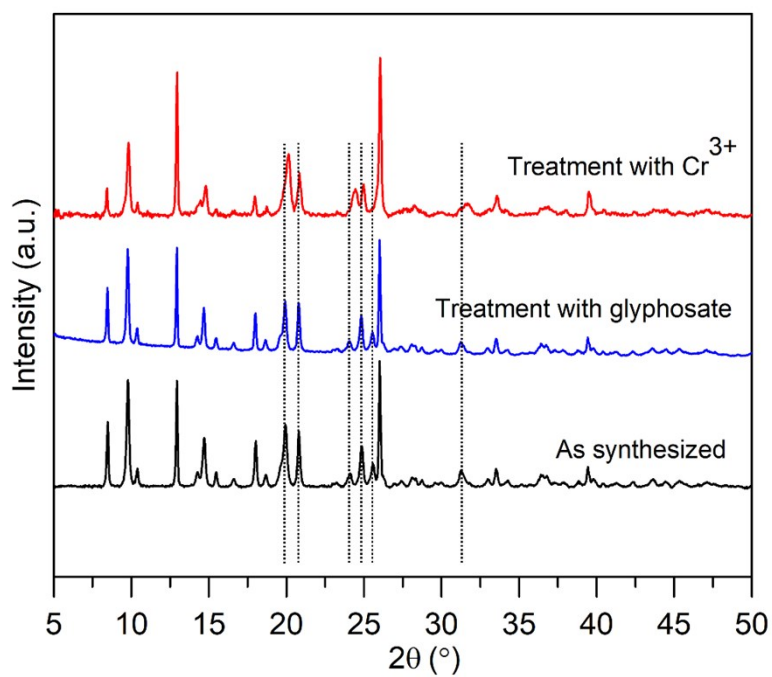

**Fig. S17** PXRD patterns of as-synthesized and  $1\text{-NH}_2$  treated with  $\text{Cr}^{3+}$  for 1 day.

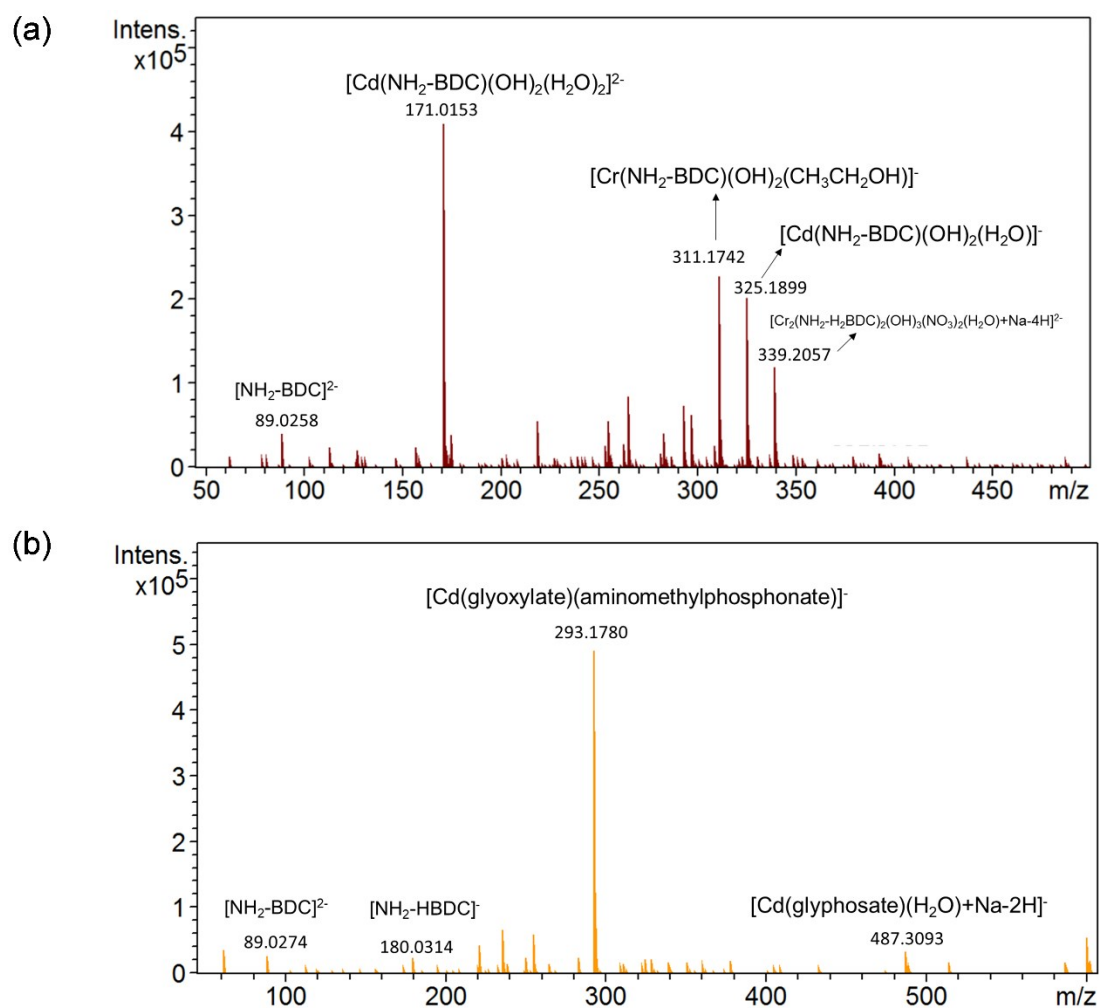

**Fig. S18** ESI-MS spectra of **1-NH<sub>2</sub>** upon the addition of (a)  $\text{Cr}^{3+}$  and (b) glyphosate.

## References

- [1] Q. Yang, J. Wang, X. Chen, W. Yang, H. Pei, N. Hu, Z. Li, Y. Suo, T. Li and J. Wang, The simultaneous detection and removal of organophosphorus pesticides by a novel Zr-MOF based smart adsorbent. *J. Mater. Chem. A*, 2018, **6**, 2184–2192.
- [2] D. Wang, B. Lin, Y. Cao, M. Guo and Y. Yu, A highly selective and sensitive fluorescence detection method of glyphosate based on an immune reaction strategy of carbon dot labeled antibody and antigen magnetic beads. *J. Agric. Food Chem.*, 2016, **64**, 6042–6050.
- [3] L. Wang, Y. Bi, J. Gao, Y. Li, H. Ding and L. Ding, Carbon dots based turn-on fluorescent probes for the sensitive determination of glyphosate in environmental water samples. *RSC Adv.*, 2016, **6**, 85820–85828.

- [4] Y. Yuan, J. Jiang, S. Liu, J. Yang, H. Zhang, J. Yan and X. Hu, Fluorescent carbon dots for glyphosate determination based on fluorescence resonance energy transfer and logic gate operation. *Sens. Actuators B Chem.*, 2017, **242**, 545-553
- [5] J. Jimenez-Lopez, E. Llorent-Martinez, P. OrtegaBarrales and A. Ruiz-Medina, Graphene quantum dots-silver nanoparticles as a novel sensitive and selective luminescence probe for the detection of glyphosate in food samples. *Talanta*, 2020, **207**, 120344.
- [6] B. C. M. A. Ashwin, C. Saravanan, T. Stalin, P. Muthu Mareeswaran and S. Rajagopal, FRET-based solid-state luminescent glyphosate sensor using calixarene-grafted ruthenium(ii)bipyridine doped silica nanoparticles. *ChemPhysChem*, 2018, **19**, 2768–2775.
- [7] X.-Y. Guo, F. Zhao, J.-J. Liu, Z.-L. Liu, and Y.-Q. Wang, An ultrastable zinc(ii)-organic framework as a recyclable multiresponsive luminescent sensor for Cr(iii), Cr(vi) and 4-nitrophenol in the aqueous phase with high selectivity and sensitivity. *J. Mater. Chem. A*, 2017, **5**, 20035–20043.
- [8] J. Liu, G. Ji, J. Xiao, and Z. Liu, Ultrastable 1D europium complex for simultaneous and quantitative sensing of Cr(III) and Cr(VI) ions in aqueous solution with high selectivity and sensitivity. *Inorg. Chem.*, 2017, **56**, 4197–4205.
- [9] T.-Y. Gu, M. Dai, D. J. Young, Z.-G. Ren, and J.-P. Lang, Luminescent Zn(II) coordination polymers for highly selective sensing of Cr(III) and Cr(VI) in water. *Inorg. Chem.*, 2017, **56**, 4668–4678.
- [10] Y. Wang, H. Yang, G. Cheng, Y. W, and S. Lin, A new Tb(II)-functionalized layer-like Cd-MOF as luminescent probe for highselectively sensing of Cr<sup>3+</sup>. *CrystEngComm*, 2017, **19**, 7270–7276.
- [11] X. Meng, M.-J. Wei, H.-N. Wang, H.-Y. Zang, and Z.-Y. Zhou, Multifunctional luminescent Zn(ii)-based metal-organic framework for high proton-conductivity and detection of Cr<sup>3+</sup> ions in the presence of mixed metal ions. *Dalton Trans.*, 2018, **47**, 1383–1387.
- [12] R. Lv, J. Wang, Y. Zhang, H. Li, L. Yang, S. Liao, W. Gu and X. Liu, An amino-decorated dual-functional metal-organic framework for highly selective sensing of Cr(III) and Cr(VI) ions and detection of nitroaromatic explosives. *J. Mater. Chem. A*, 2016, **4**, 15494–15500.
- [13] X.-M. Tian, S.-L. Yao, C.-Q. Qiu, T.-F. Zheng, Y.-Q. Chen, H. Huang, J.-L. Chen, S.-L. Liu, and H.-R. Wen, Turn-On Luminescent Sensor toward Fe<sup>3+</sup>, Cr<sup>3+</sup>, and Al<sup>3+</sup> Based on a Co(II) Metal-Organic Framework with Open Functional Sites. *Inorg. Chem.* 2020, **59**, 2803–2810.
- [14] G. C. de Souza, A. L. den E.A. de Santana, P. A. da Silva, D. V. Freitas, M. Navarro, A. P. S. Paim and A. F. Lavorante, Employment of electrochemically synthesized TGA-CdSe quantum dots for Cr<sup>3+</sup> determination in vitamin supplements. *Talanta*, 2015, **144**, 986 – 991.
- [15] O. Sunnapu, N. G. Kotla, B. Maddiboyina, G. S. Asthana, J. Shanmugapriya, K. Sekar, S. Singaravadivel and G. Sivaraman, Rhodamine based effective chemosensor for Chromium(III) and their application in live cell imaging. *Sens. Actuators B Chem.*, 2017, **246**, 761 – 768.
- [16] K. Saravana Mani, R. Rajamanikandan, G. Ravikumar, B. Vijaya Pandiyan, P. Kolandaivel, M. Ilanchelian and S. P. Rajendran, Highly sensitive coumarin-pyrazolone probe for the detection of Cr<sup>3+</sup> and the application in living cells. *ACS Omega*, 2018, **3**, 17212–17219.
- [17] L. Wang, J. Liu, Z. Zhou, M. Xu and B. Wang, Convenient fluorescence detection of Cr(iii) in aqueous solution based on the gold nanoparticle mediated release of the acridine orange probe. *Anal. Methods*, 2017, **9**, 1786–1791.
- [18] M. Faraz, A. Abbasi, F. K. Naqvi, N. Khare, R. Prasad, I. Barman and R. Pandey, Polyindole/cadmium sulphide nanocomposite based turn-on, multi-ion fluorescence sensor for detection of Cr<sup>3+</sup>, Fe<sup>3+</sup>, and Sn<sup>2+</sup> ions. *Sens. Actuators B Chem.*, 2018, **269**, 195 – 202.
